# Supplementary material
Source: PubMed Central journal article supplement (PMC3177077)
Supplement: mmc1.pdf [file mmc1.pdf]

# Non-kinetic modeling of the mechanical unfolding of multimodular proteins: theory and experiments

F. Benedetti, C. Micheletti, G. Bussi, S. K. Sekatskii, and G. Dietler

## SUPPORTING INFORMATION

|                                     |                                  | peak order $n$ | 6          | 5          | 4          | 3          | 2          | 1          |
|-------------------------------------|----------------------------------|----------------|------------|------------|------------|------------|------------|------------|
| average unfolding force (pN)        | Average – experiment             |                | <b>124</b> | <b>128</b> | <b>129</b> | <b>137</b> | <b>146</b> | <b>162</b> |
|                                     | back-calculation from peak order | $m = 1$        | 127        | 129        | 132        | 137        | 144        | --         |
|                                     |                                  | $m = 2$        | 123        | 126        | 130        | 136        | --         | 168        |
|                                     |                                  | $m = 3$        | 120        | 124        | 129        | --         | 149        | 170        |
|                                     |                                  | $m = 4$        | 118        | 123        | --         | 137        | 150        | 170        |
|                                     |                                  | $m = 5$        | 123        | --         | 134        | 142        | 153        | 170        |
|                                     |                                  | $m = 6$        | --         | 128        | 134        | 141        | 151        | 164        |
| standard deviation of the mean (pN) | Average – experiment             |                | <b>25</b>  | <b>30</b>  | <b>31</b>  | <b>31</b>  | <b>30</b>  | <b>31</b>  |
|                                     | back-calculation from peak order | $m = 1$        | 11         | 13         | 15         | 18         | 22         | --         |
|                                     |                                  | $m = 2$        | 22         | 23         | 24         | 25         | --         | 40         |
|                                     |                                  | $m = 3$        | 25         | 26         | 28         | --         | 35         | 39         |
|                                     |                                  | $m = 4$        | 27         | 29         | --         | 34         | 37         | 38         |
|                                     |                                  | $m = 5$        | 28         | --         | 31         | 33         | 34         | 32         |
|                                     |                                  | $m = 6$        | --         | 27         | 28         | 30         | 30         | 28         |

SI Table 1: Unfolding forces for GB1. Average and standard deviations of the unfolding forces as obtained from experiments on GB1 (values in bold) and from the back-calculation using data from different peak orders  $m$  as indicated. The accuracy in the prediction of the standard deviation is improved when  $m \neq 1$  is used. All the data are in units of  $pN$ .

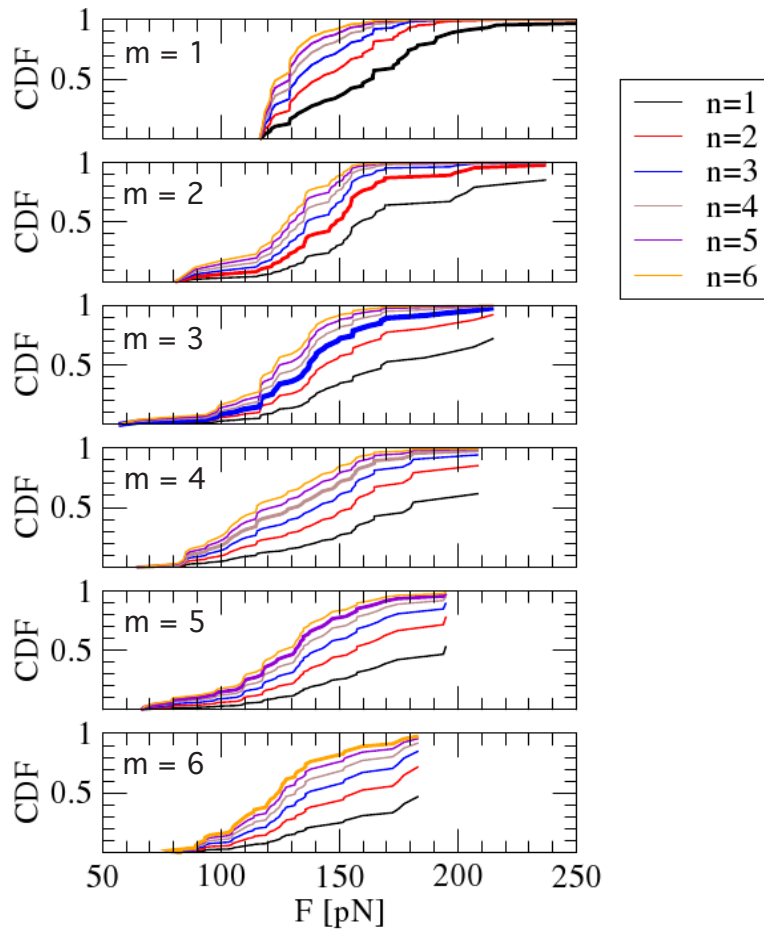

SI Figure 1: Cumulated distribution functions (CDF) for the various unfolding peaks (peak order increasing from right to left) obtained using the back-calculation starting from different values of  $m$  (different panels as indicated). The experimental CDF are highlighted with a thicker line.
